# Supplementary material for: The type of Aβ-related neuronal degeneration differs between amyloid precursor protein (APP23) and amyloid β-peptide (APP48) transgenic mice
Source: PubMed Central journal article supplement (PMC4046770; doi:10.1186/2051-5960-1-77), 2013-11-18

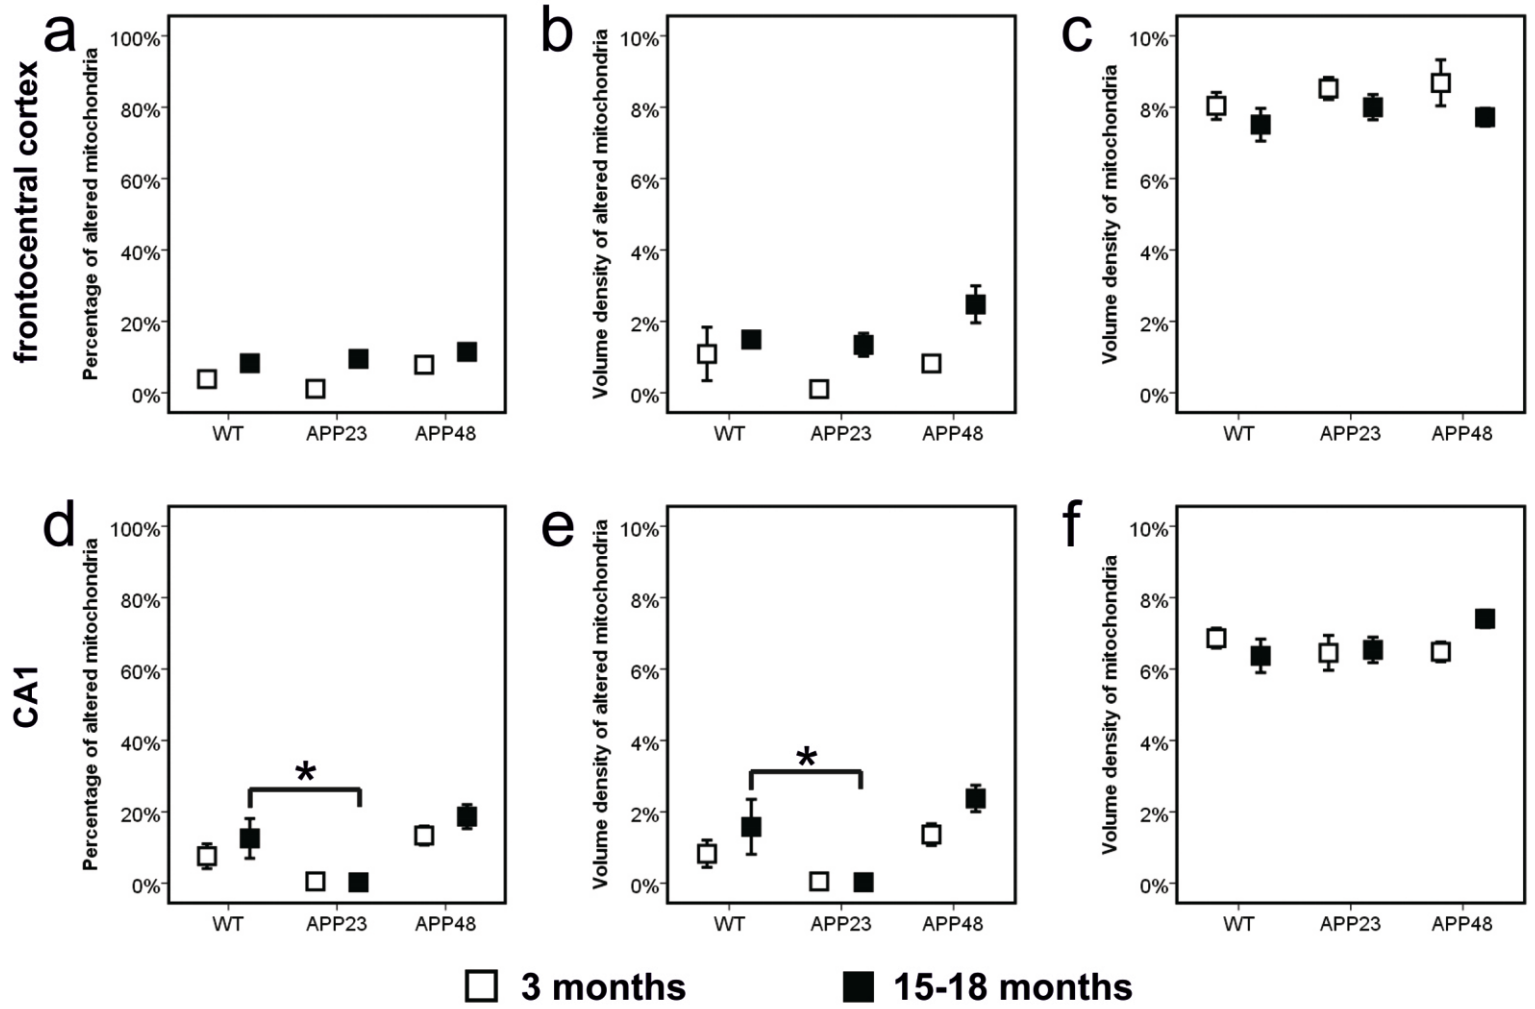

Supplement: 40478_2013_73_MOESM4_ESM.pdf [file 40478_2013_73_MOESM4_ESM.pdf]
